# Supplementary material
Source: PubMed Central journal article supplement (PMC3285492)

Supplemental Figure 1

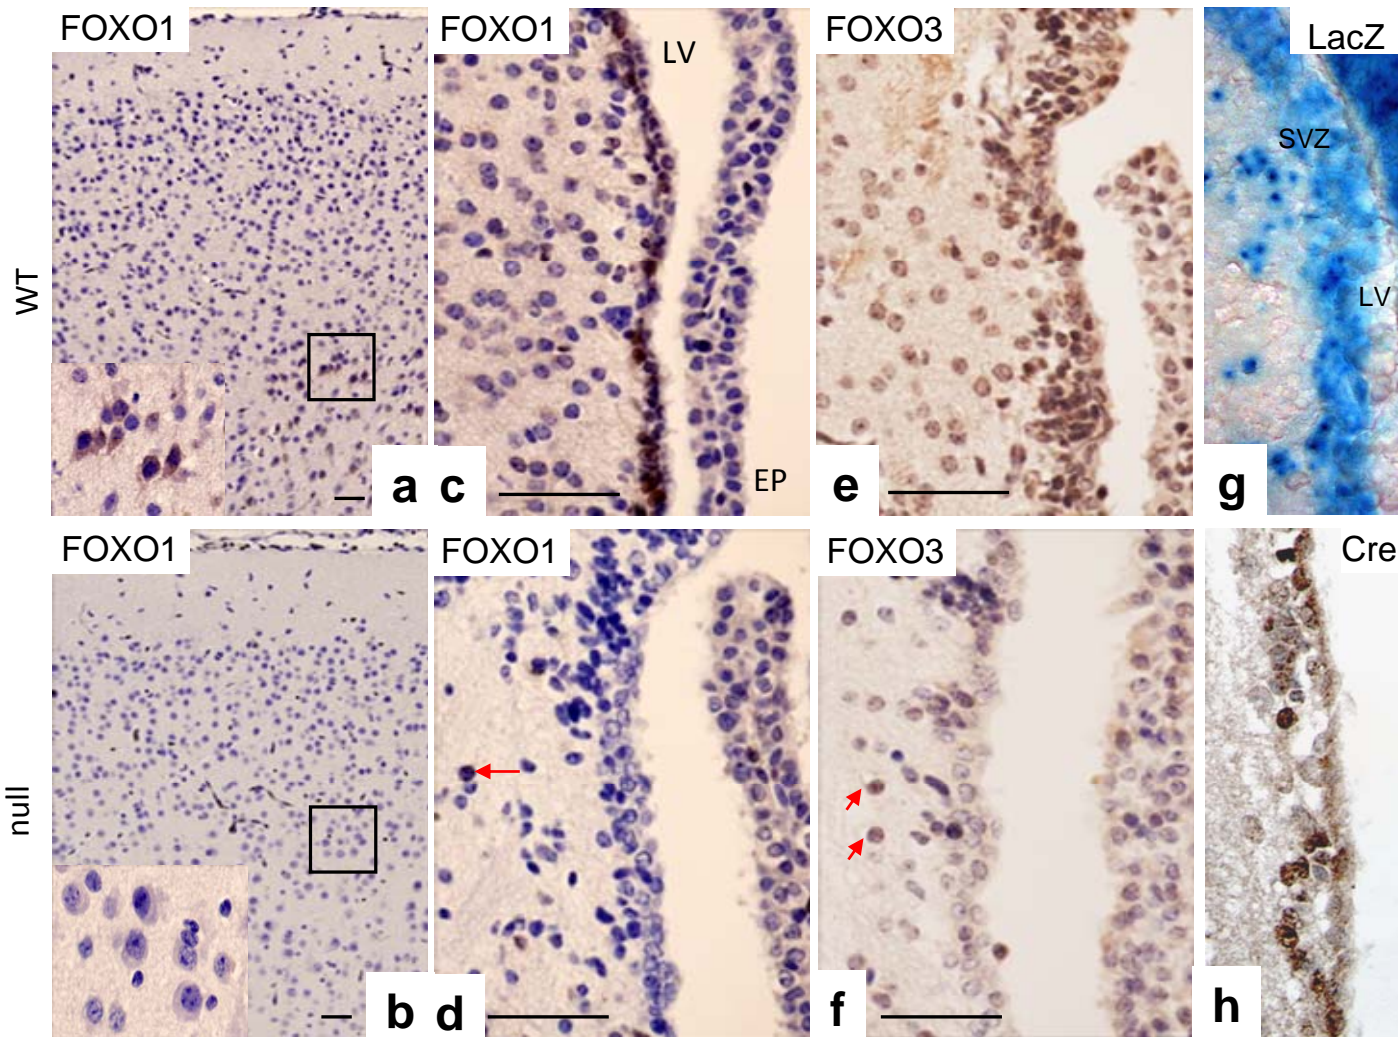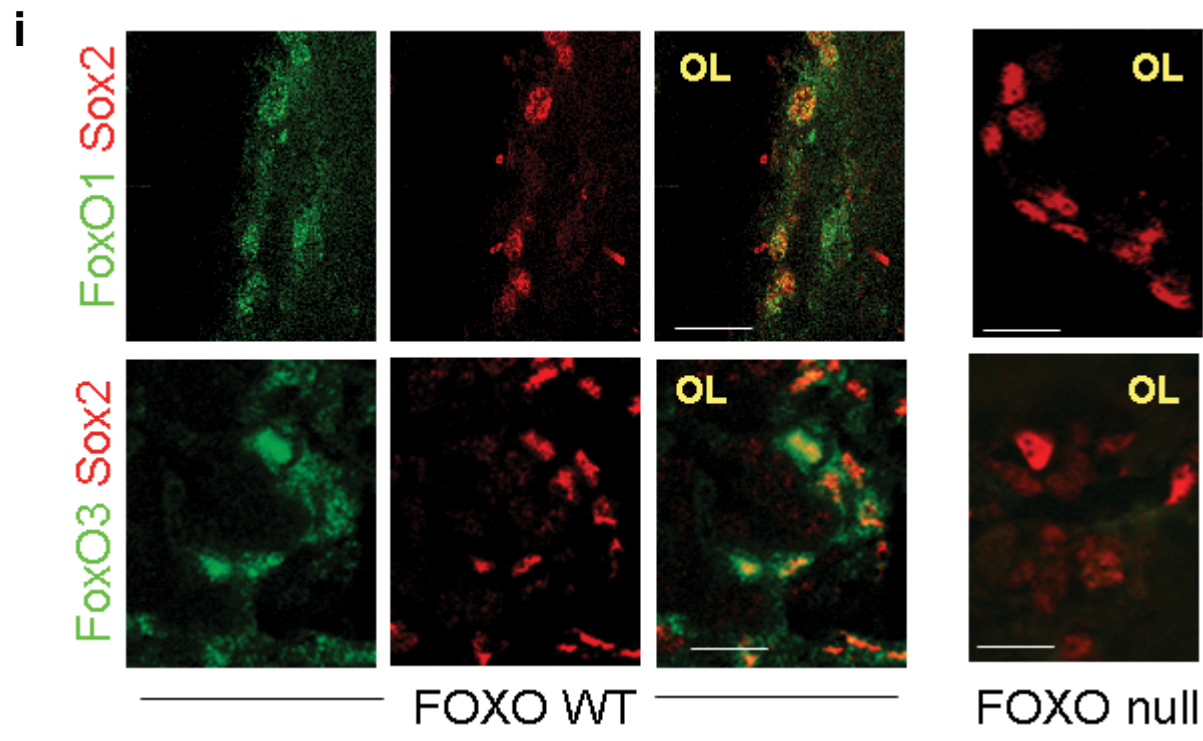

Supplemental Figure 1 continue

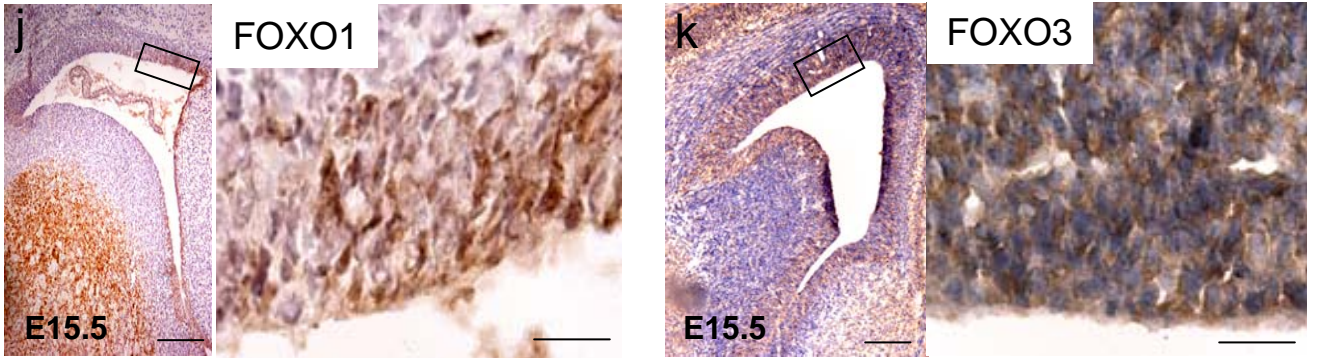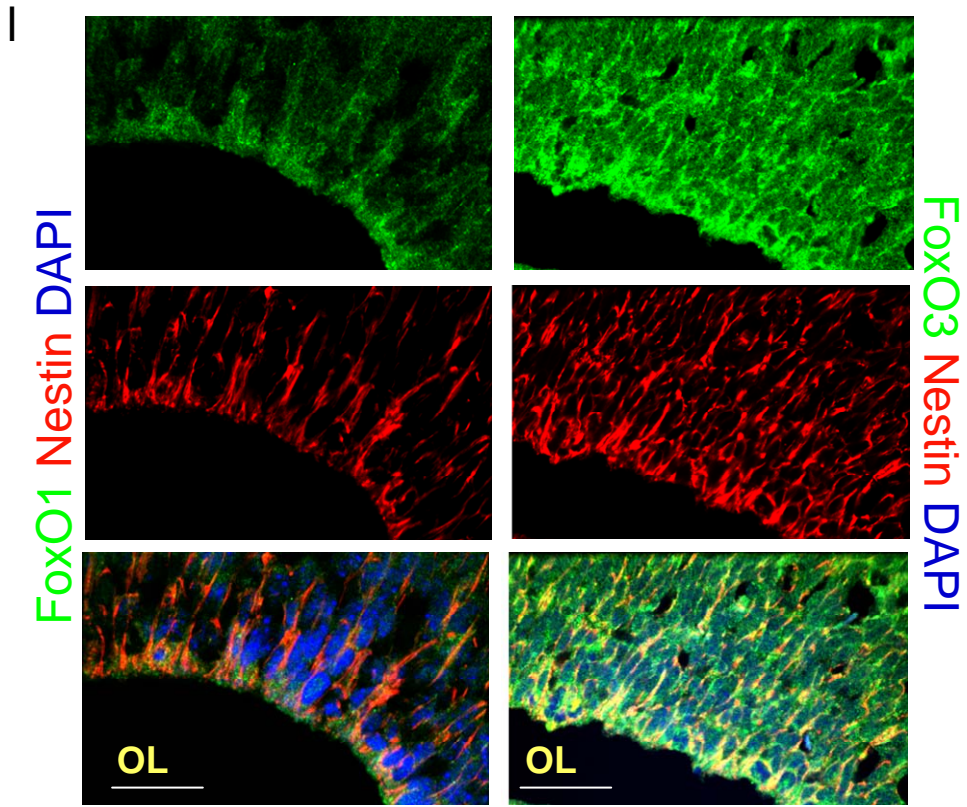

Supplemental Figure 1 continue

**m**

FOXO1

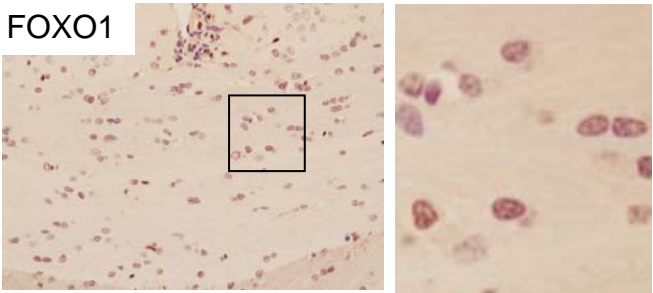

Corpus callosum

FOXO1

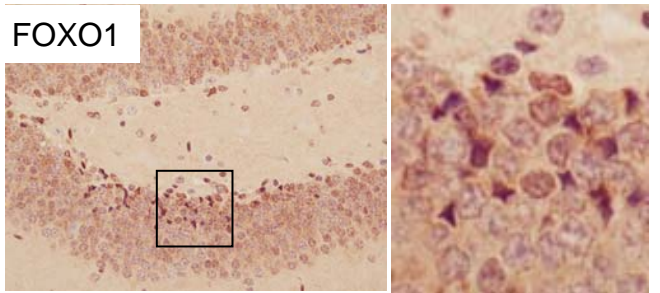

Dentate gyrus

FOXO1

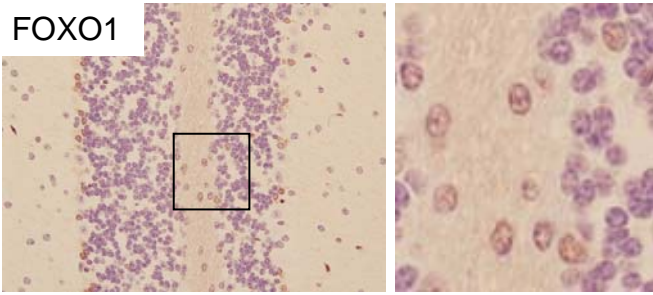

Cerebellum

FOXO1

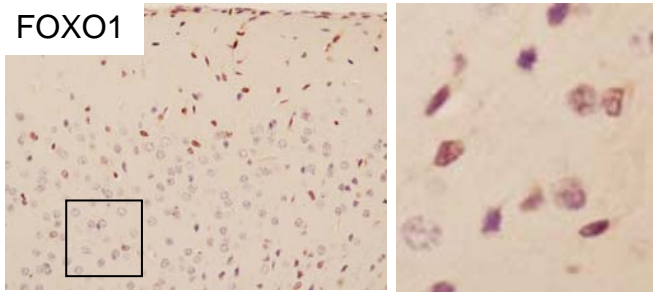

Cortex

**n**

FOXO3

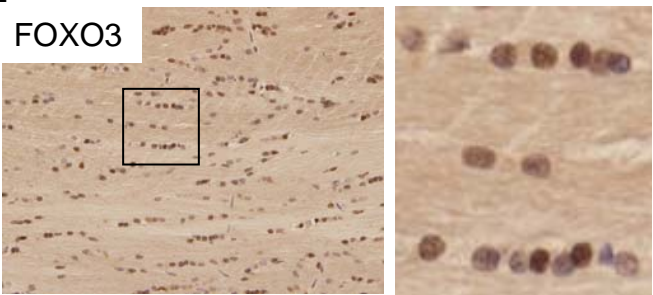

Corpus callosum

FOXO3

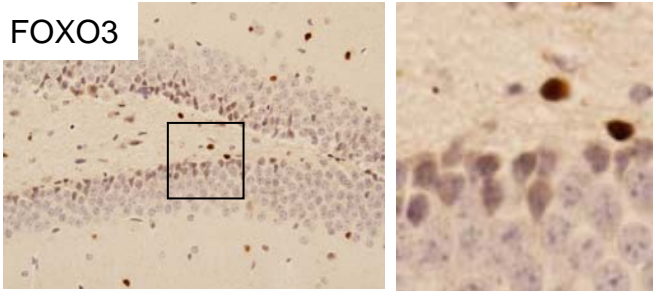

Dentate gyrus

FOXO3

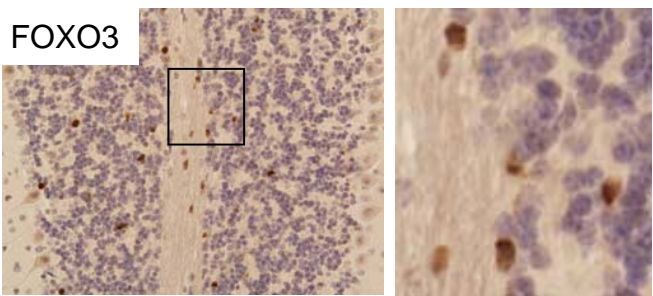

Cerebellum

FOXO3

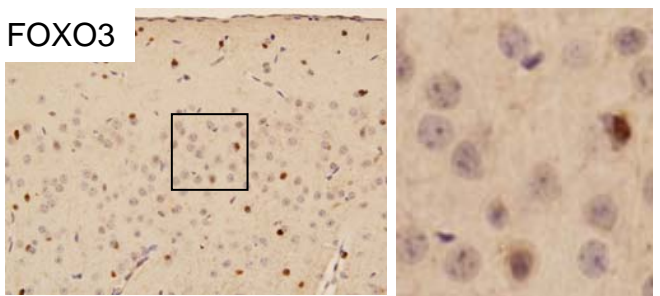

Cortex

Supplemental Figure 1 continue

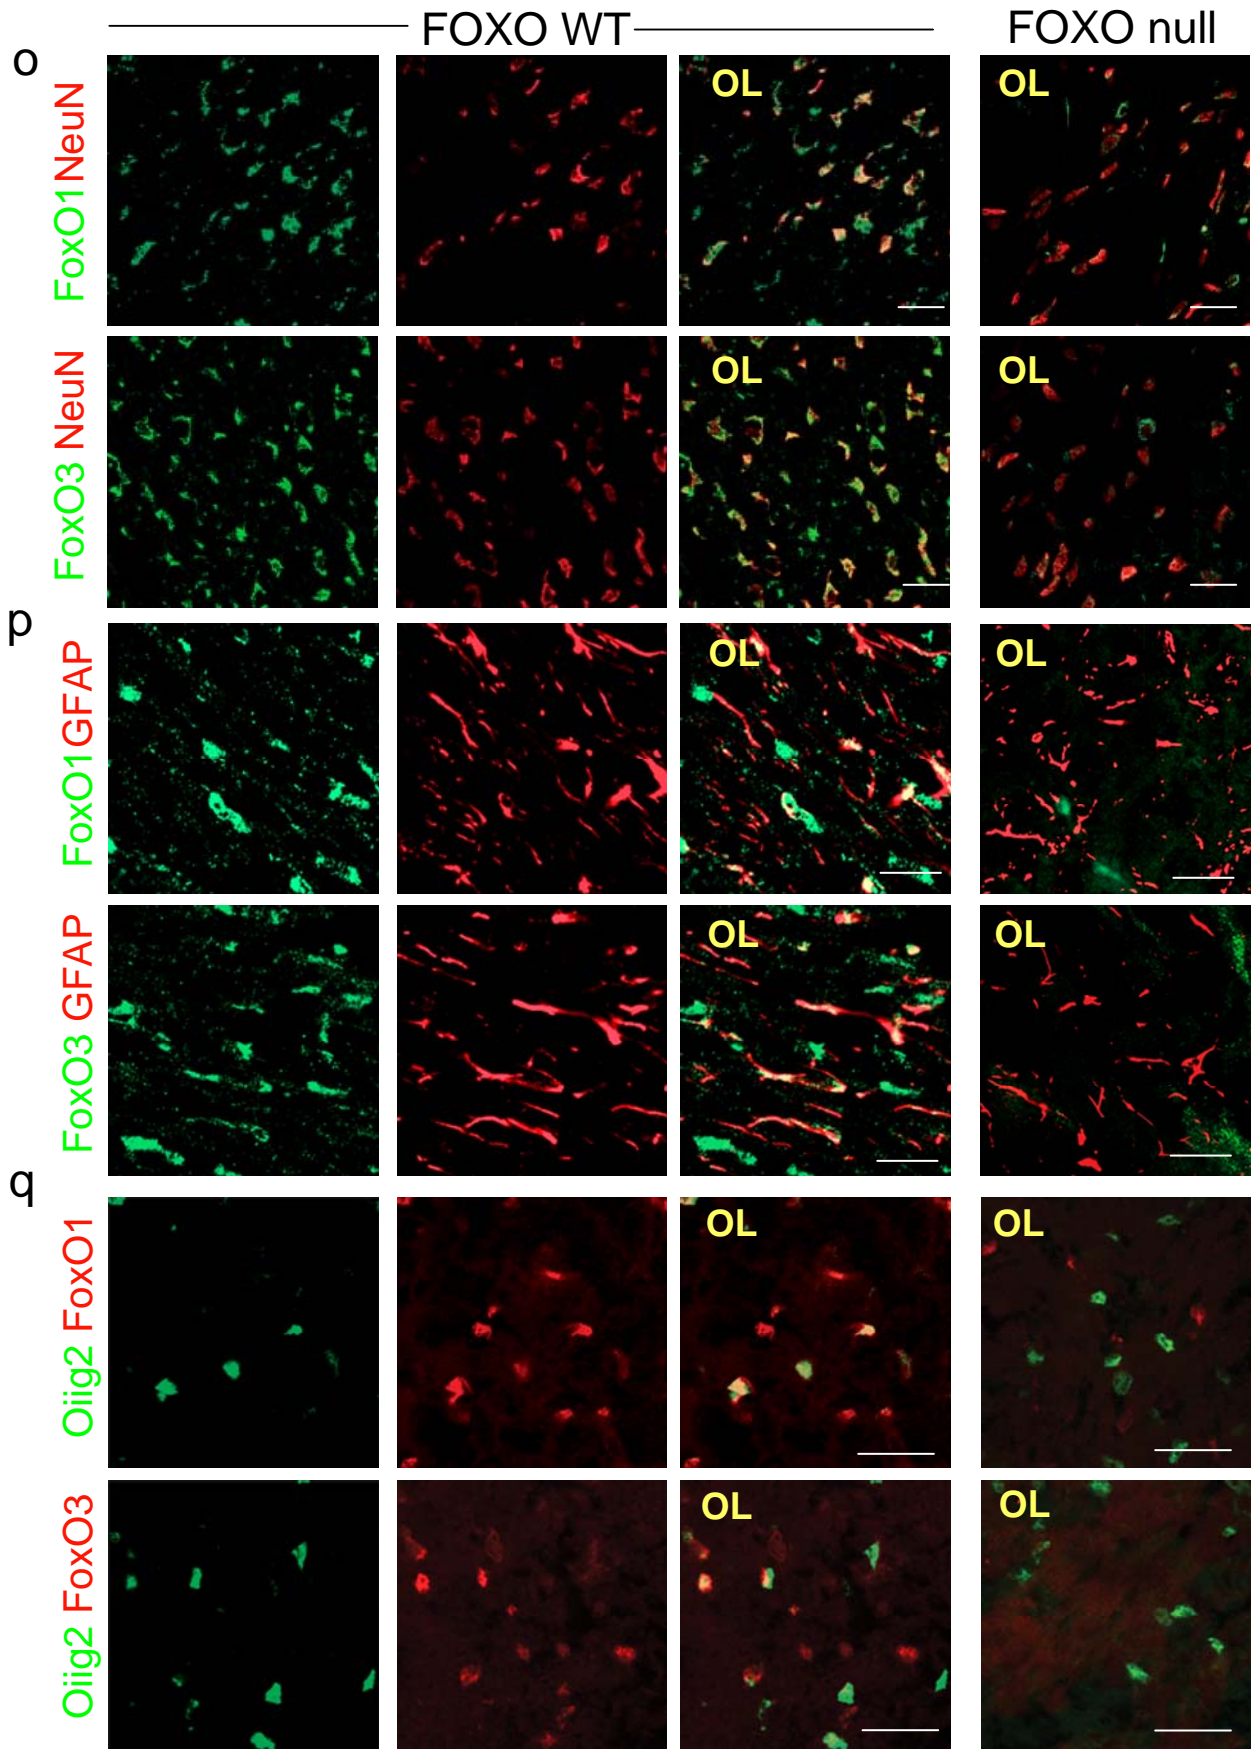

# Supplemental Figure 2

**a**

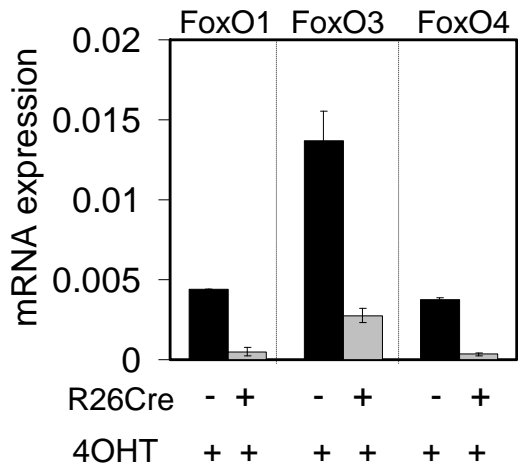

**b**

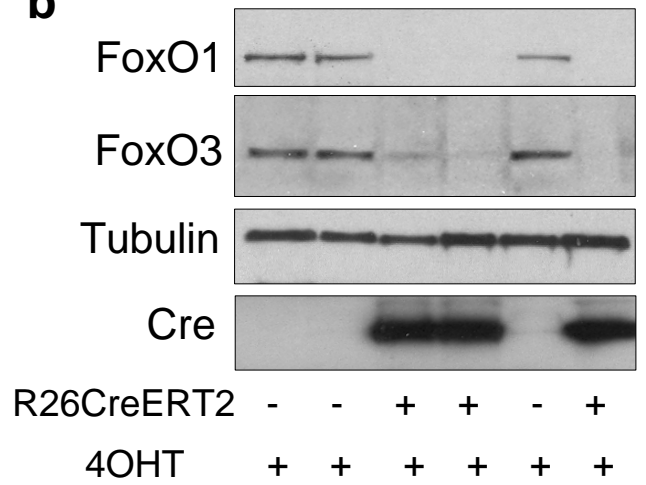

**c**

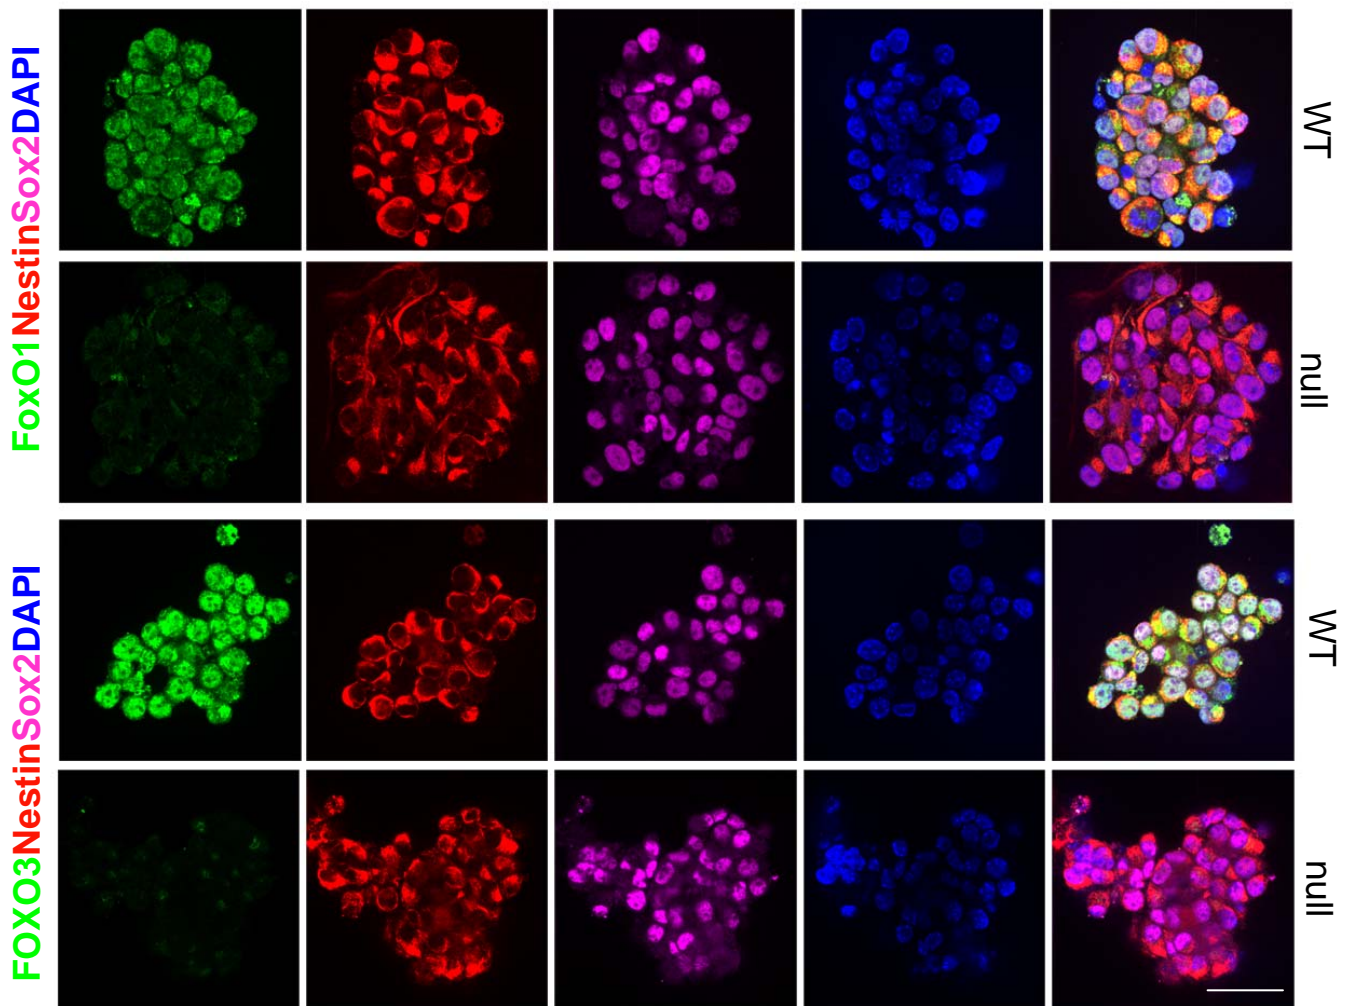

# Supplemental Figure 3

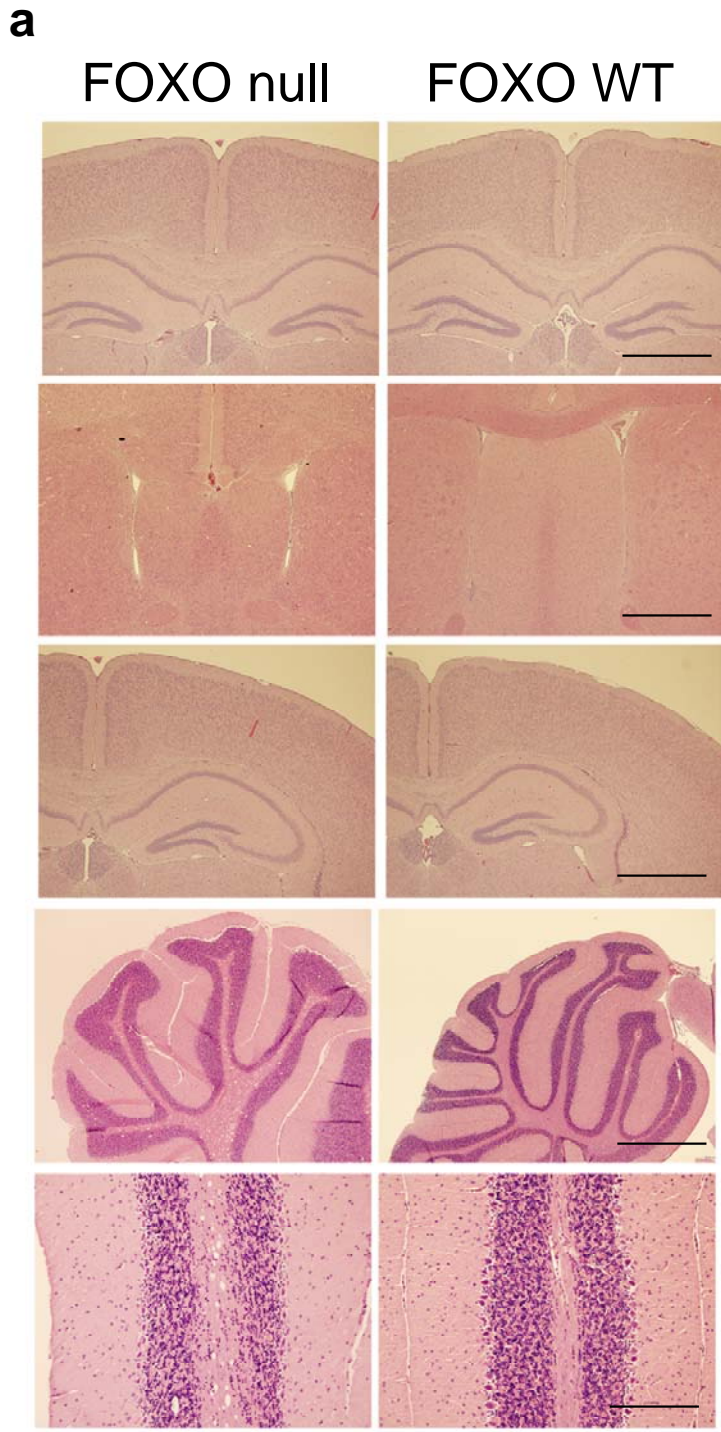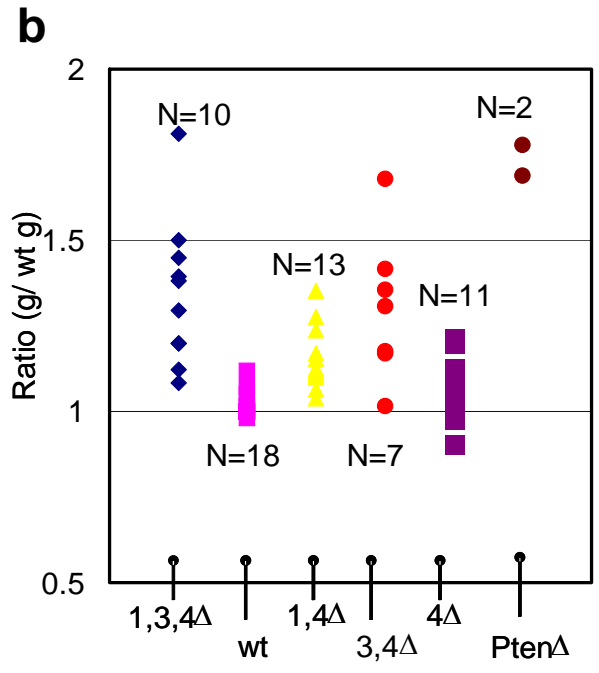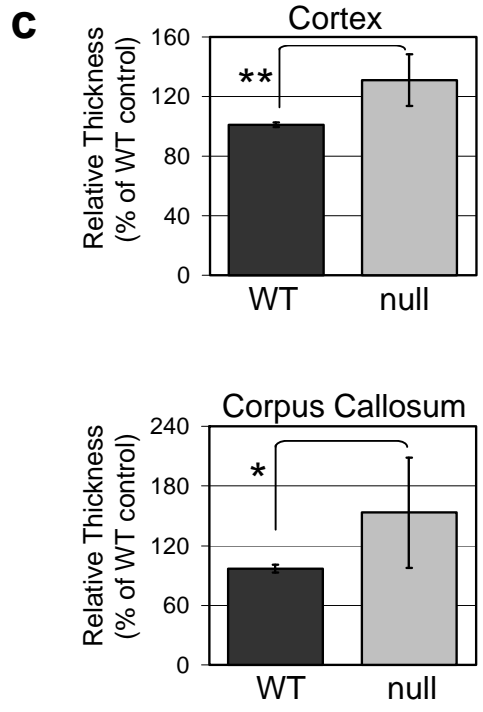

# Supplemental Figure 4

**a**

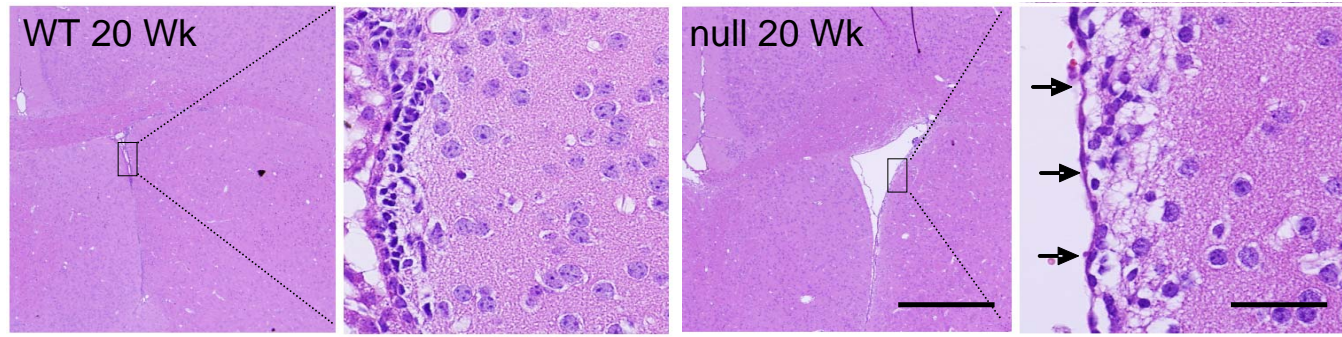

**b**

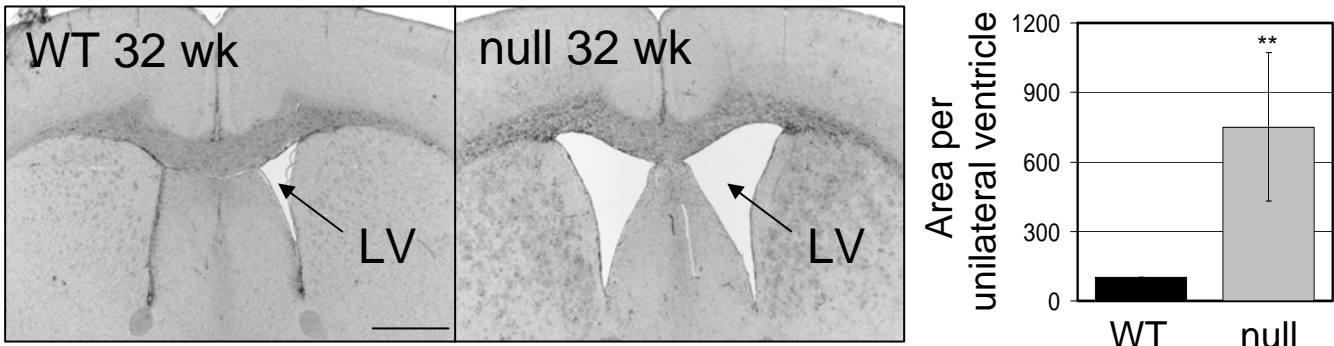

**c**

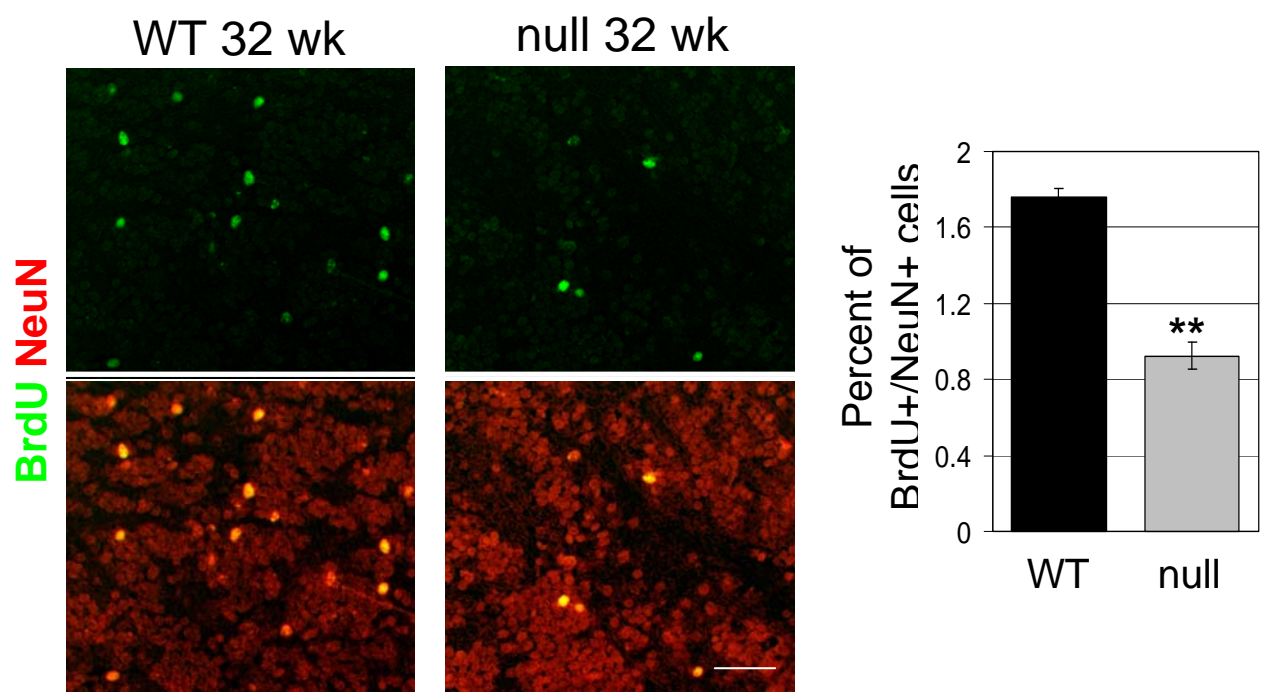

Supplemental Figure 5

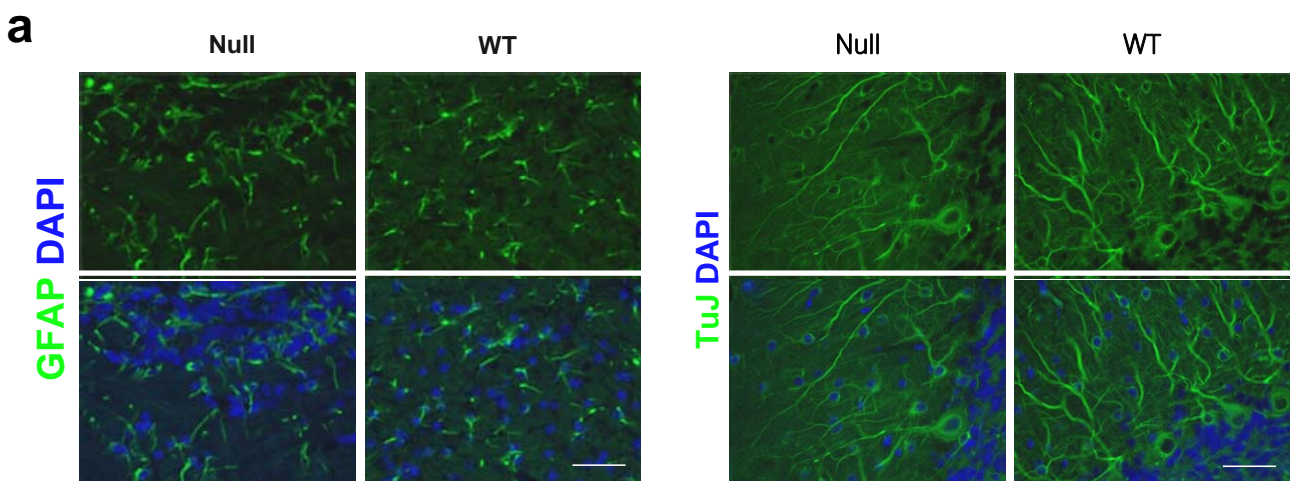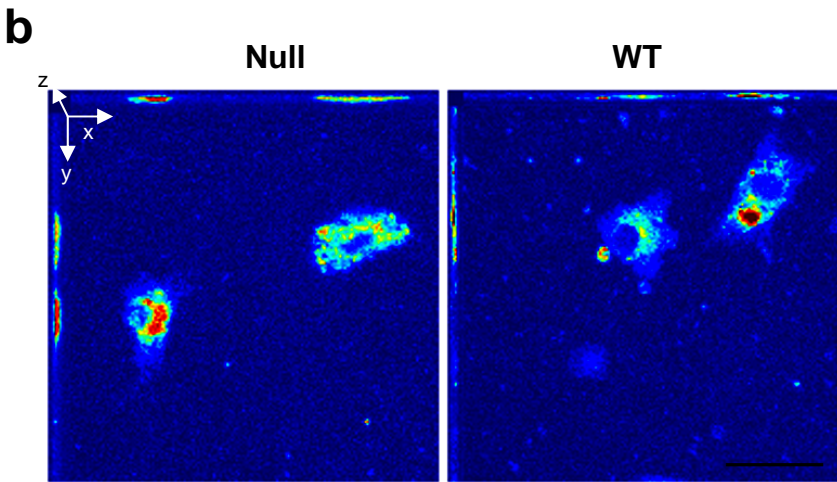

Volume ( $\mu\text{m}^3$ )    1430.4 $\pm$ 540.1                      1635.5 $\pm$ 798.1

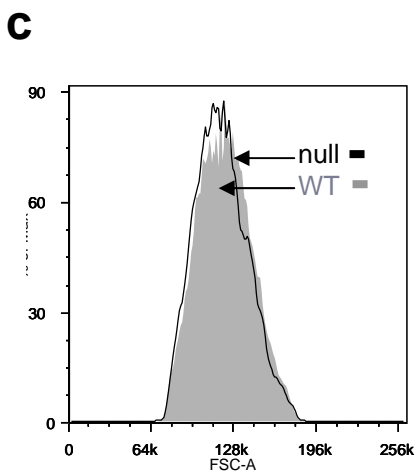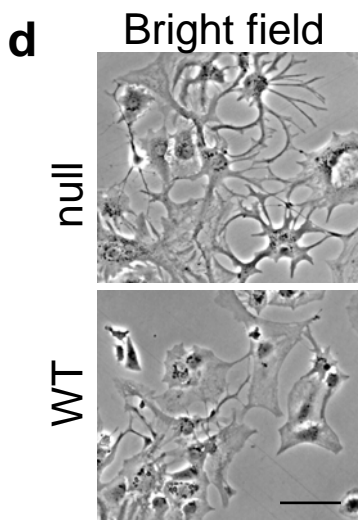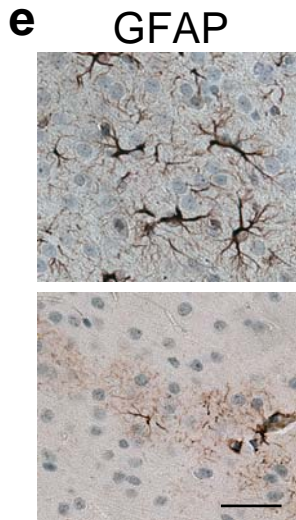



# Supplemental Figure 6

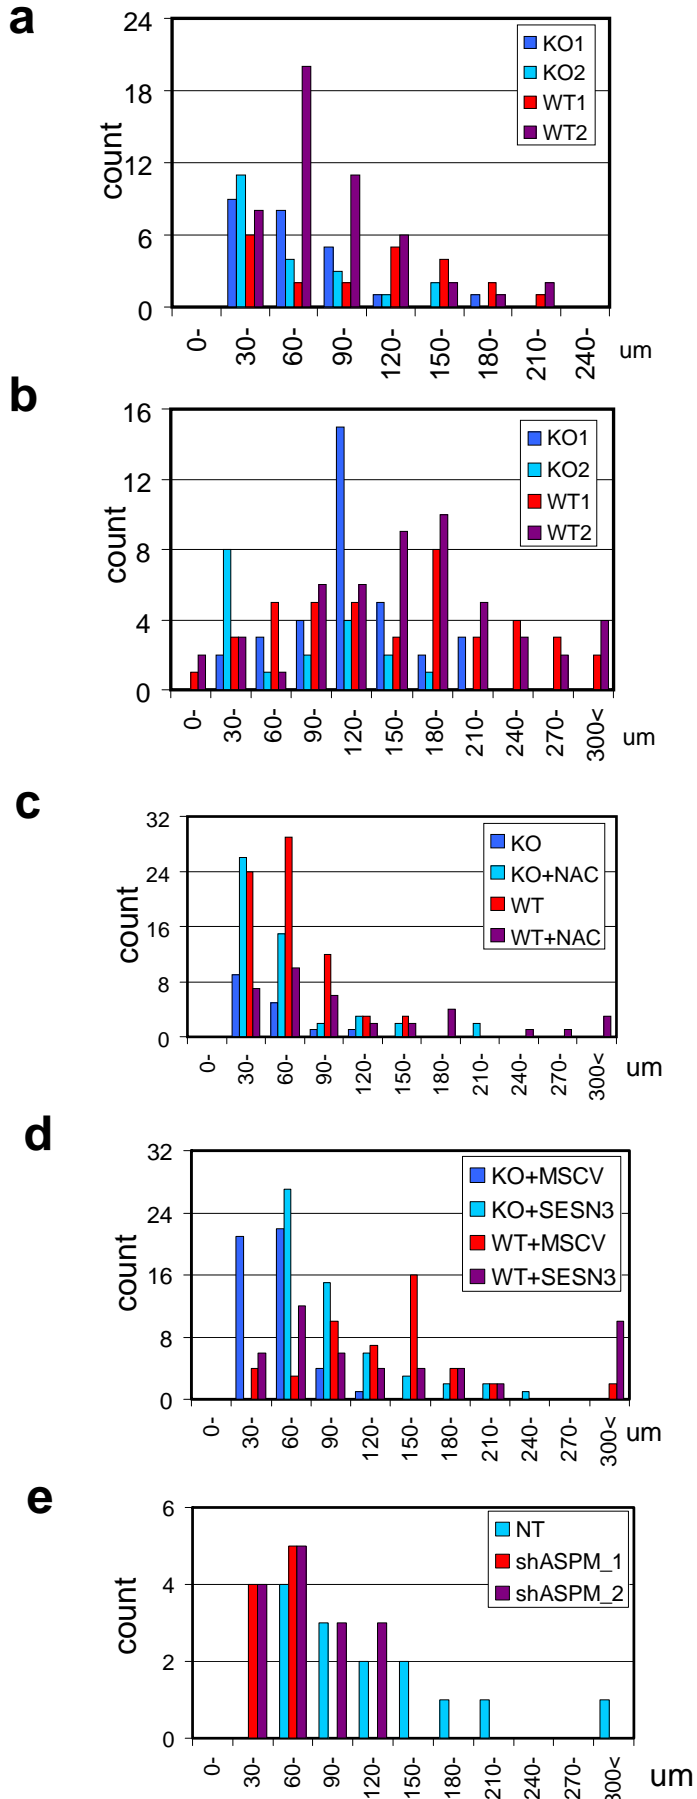

Supplemental Figure 7

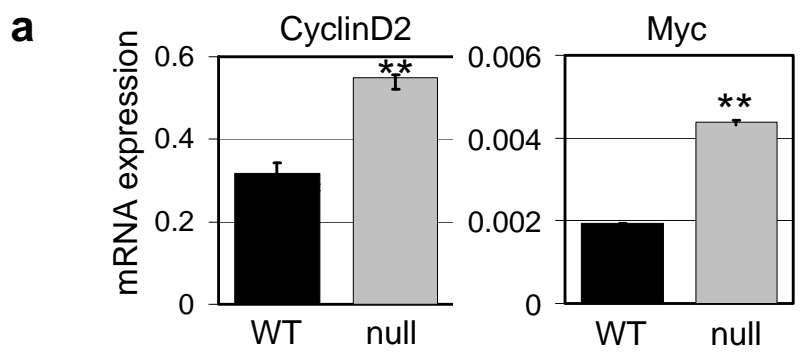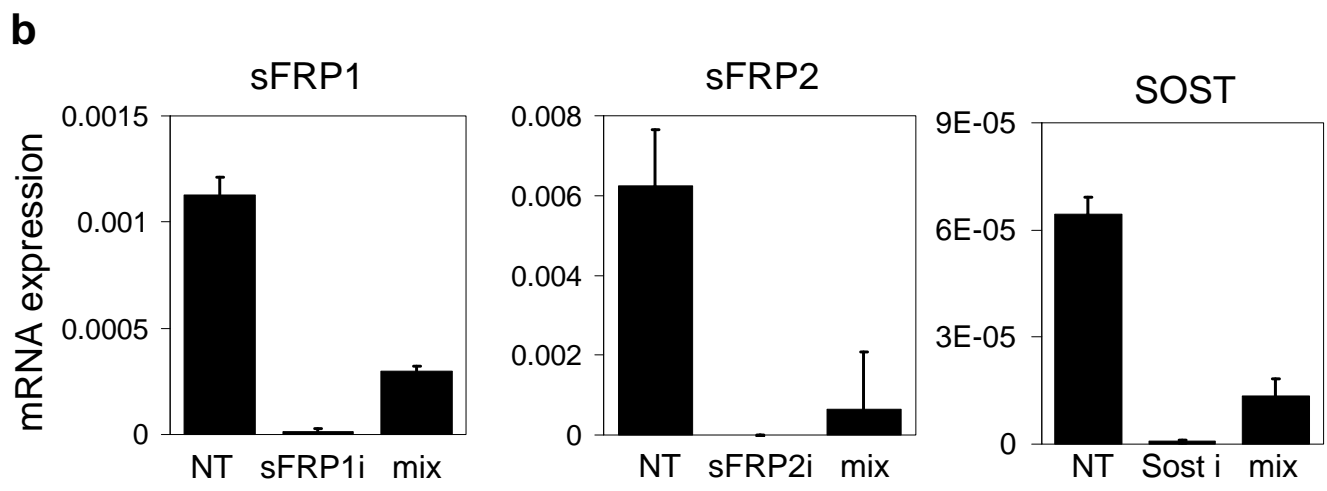

# Supplemental Figure 8

**a**

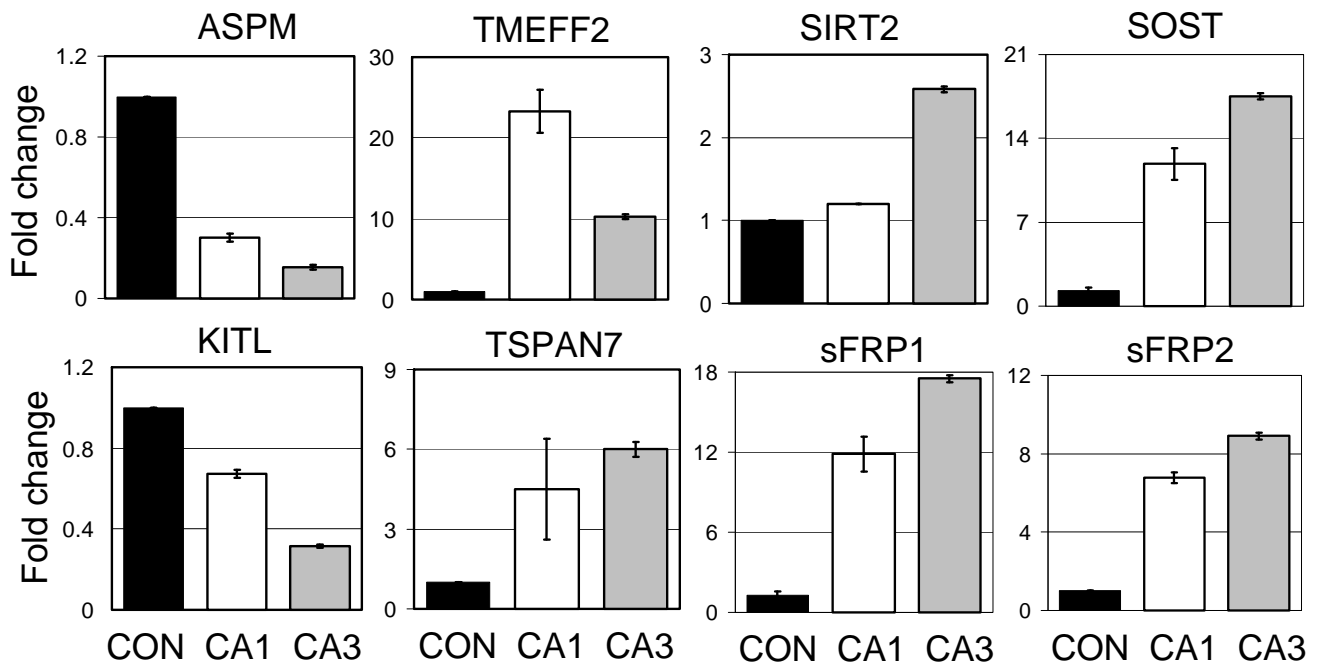

**b**

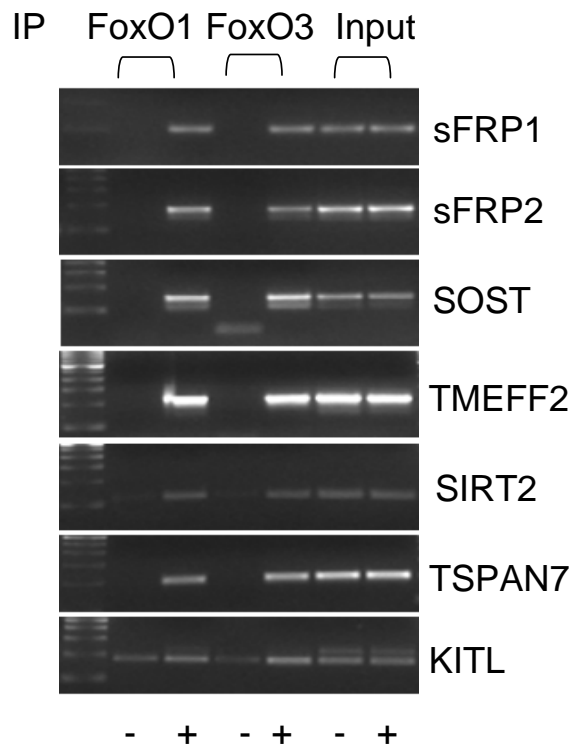

Supplement: NIHMS150600-supplement-01.pdf [file NIHMS150600-supplement-01.pdf]
